# Supplementary material for: Enhanced resistance to oxidative decomposition of aqueous electrolytes for aqueous lithium-ion batteries
Source: Royal Society of Chemistry journal article supplement (doi:10.1039/c6cc00873a), 2016-01-01
Supplement: c6cc00873a1.pdf [file c6cc00873a1.pdf]

**Supporting Information for**

**Enhanced Resistance to Oxidative Decomposition of Aqueous  
Electrolytes for Aqueous Lithium-ion Batteries**

Kohei Miyazaki, Toshiki Shimada, Satomi Ito, Yuko Yokoyama, Tomokazu Fukutsuka, Takeshi

Abe

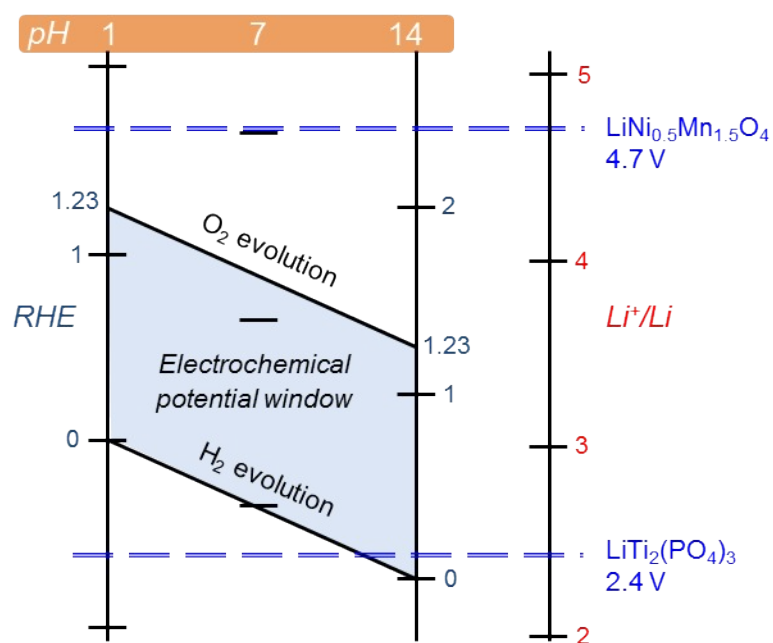

**Scheme S1.** Electrochemical potential window of water and redox potential of active materials.

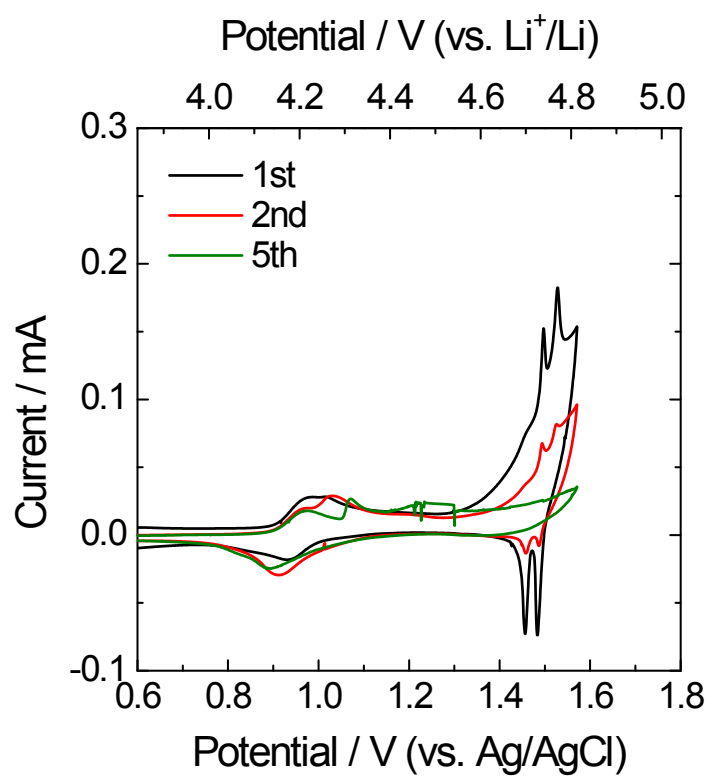

**Figure S1.** Cyclic voltammograms of LNMO with an aqueous solution of 0.5 mol dm<sup>-3</sup> LiNO<sub>3</sub> with saturated PDSS.

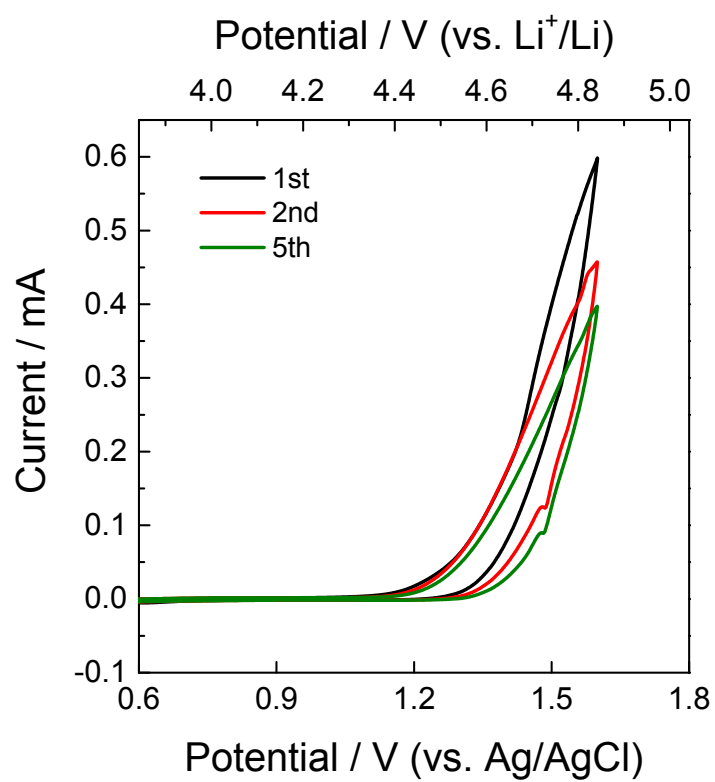

**Figure S2.** Cyclic voltammograms of LNMO with an aqueous solution of 0.25 mol dm<sup>-3</sup> Li-PO<sub>4</sub> buffer.

**Table S1.** Elemental ratios of LNMO thin films before and after potential cycles

|    | As-prepared | After cycles | Xe etched |
|----|-------------|--------------|-----------|
| C  | 81.7        | 76.6         | 76.2      |
| O  | 13.6        | 18.9         | 19.2      |
| Mn | 3.4         | 2.6          | 2.8       |
| Ni | 1.0         | 1.0          | 1.2       |
| S  | 0.3         | 0.9          | 0.7       |

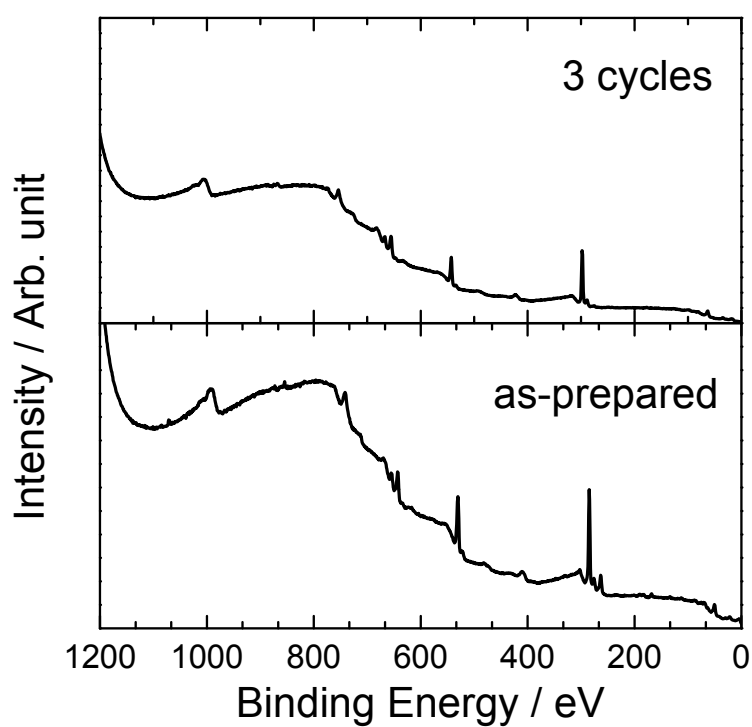

**Figure S3.** Surface analysis of XPS measurement.

**Table S2.** Spin-spin relaxation time ( $T_2$ ) and viscosity of PDSS aqueous solutions

| PDSS                     | $T_2$ (ms) | Viscosity (cPa·s) |
|--------------------------|------------|-------------------|
| 0.1 mol dm <sup>-3</sup> | 2296       | 1.0               |
| 2.0 mol dm <sup>-3</sup> | 1482       | 6.0               |

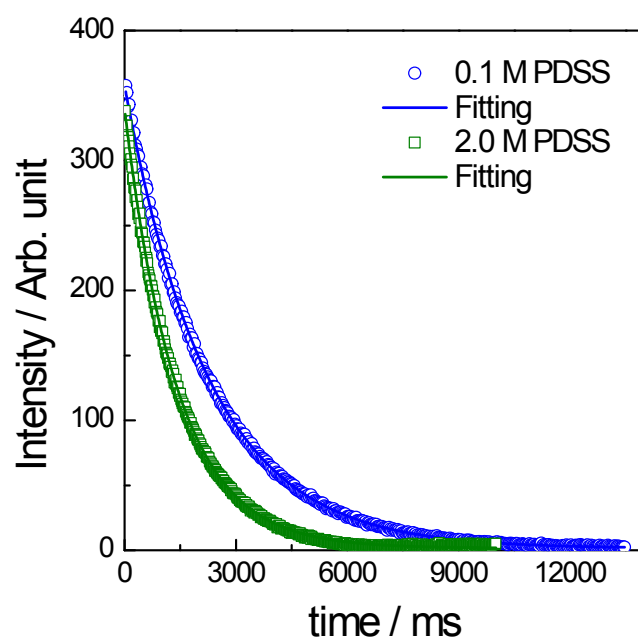

**Figure S4.** Relaxation curves from <sup>1</sup>H CPMG experiment at 25 °C.

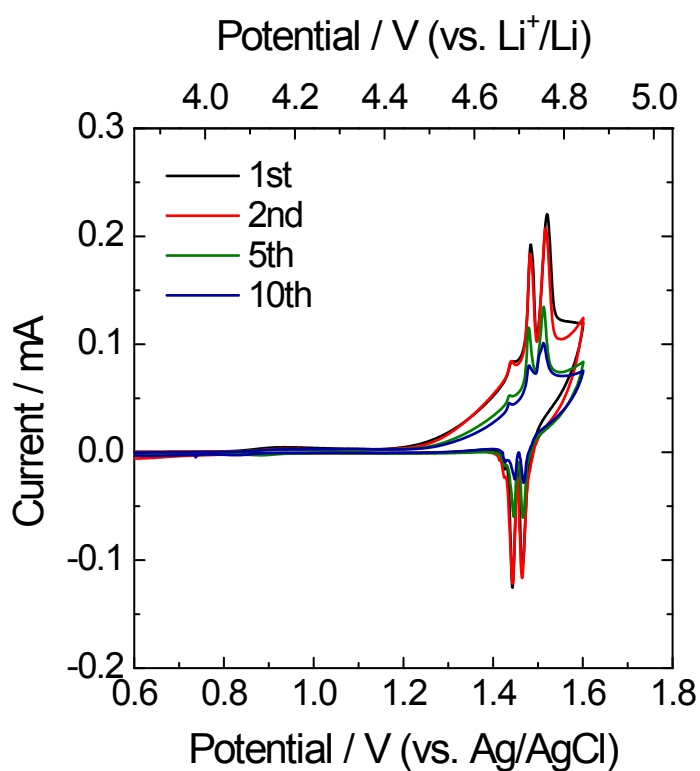

**Figure S5.** Cyclic voltammograms of LNMO on Au substrate with an aqueous solution of  $0.25 \text{ mol dm}^{-3}$  Li-PO<sub>4</sub> buffer with saturated PDSS (pH 7).
